# Supplementary material for: Fluorescent polymer dots and graphene oxide based nanocomplexes for “off-on” detection of metalloproteinase-9
Source: Royal Society of Chemistry journal article supplement (doi:10.1039/c9nr06557a), 2019-01-01
Supplement: c9nr06557a1.pdf [file c9nr06557a1.pdf]

## Supporting Information

### Fluorescent polymer dots and graphene oxide based nanocomplex for “off-on” detection of metalloproteinase-9

Qiaoyu Li<sup>a</sup>, Yanlin Wang<sup>a</sup>, Guopeng Yu<sup>b</sup>, Yushan Liu<sup>b</sup>, Keqi Tang<sup>c</sup>, Chuanfan Ding<sup>c</sup>, Hui Chen<sup>a\*</sup>, and  
Shaoning Yu<sup>a,c\*</sup>

<sup>a</sup>Department of Chemistry, Fudan University, Shanghai 200438, China;

<sup>b</sup>Department of Urology, Shanghai Ninth People's Hospital, Shanghai Jiaotong University School of Medicine, Shanghai 200011, China;

<sup>c</sup>Institute of Mass Spectrometry, School of Material Science and Chemical Engineering, Ningbo University, Ningbo, Zhejiang 315211, China.

\*Corresponding author at: Department of Chemistry, Fudan University, Shanghai 200438, China. Tel: 86+13501953704. Email address: yushaoning@fudan.edu.cn (for S.Y.) and chenhui@fudan.edu.cn (for H.C.).

#### Table of contents:

**Figure. S1** The relative quantum yield of Pdots.

**Figure. S2** The Quenching effect (QE) of GO on Pep-Pdots fluorescence.

**Figure. S3** The optimum time for GO quenching on Pep-Pdots.

**Figure. S4** Fluorescence recovery of GO-Pep-Pdots in the presence of MMP-9 at different time

**Figure. S5** Fluorescence intensity of the GO-Pep-Pdots nanocomplex at varying pH

**Figure. S6** Schematic representation of steps and the time taken for each.

**Table. S1** The pathological information of the prostate patients.

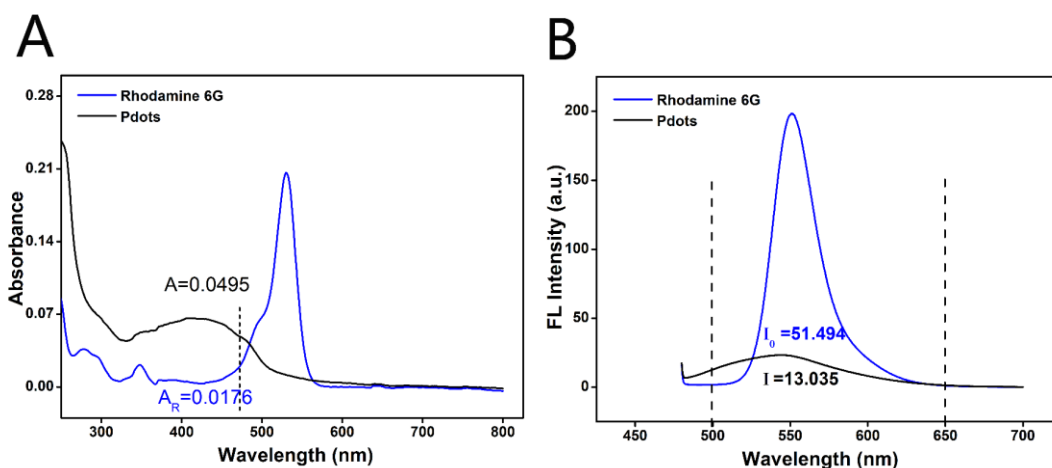

**Figure. S1** The relative quantum yield (QY) of Pdots was measured in reference to rhodamine 6G in ethanol (QY=0.95): A, The absorption spectra of the Pdots and rhodamine; B, The fluorescence spectra of Pdots and rhodamine. The formula for QY measurement is as follows:

$$QY = \frac{I}{I_0} \times \frac{A_R}{A} \times \frac{n^2}{n_R^2} \times QY_R$$

where QY is the quantum yield of the sample, I is the integral area under the fluorescence spectrum,  $n$  is the refractive index of the solvent used, and A is the absorbance at the excitation wavelength. The subscript R represents the reference.

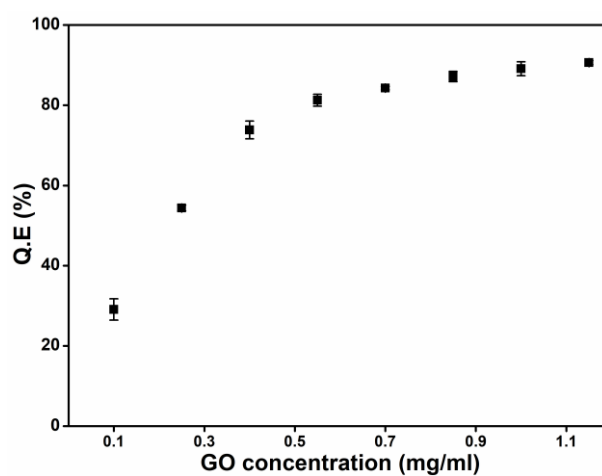

**Figure. S2** Quenching effect (QE) of GO on Pep-Pdots fluorescence was determined by respectively adding increasing concentration of GO (0 – 1.15 mg/ml) into 8 mg/ml Pep-Pdots and incubate for 10 minutes at room temperature. QE was calculated based on the decreased (F) and the original ( $F_0$ ) fluorescent intensity:

$$Q.E (\%) = \frac{F_0 - F}{F_0} \times 100$$

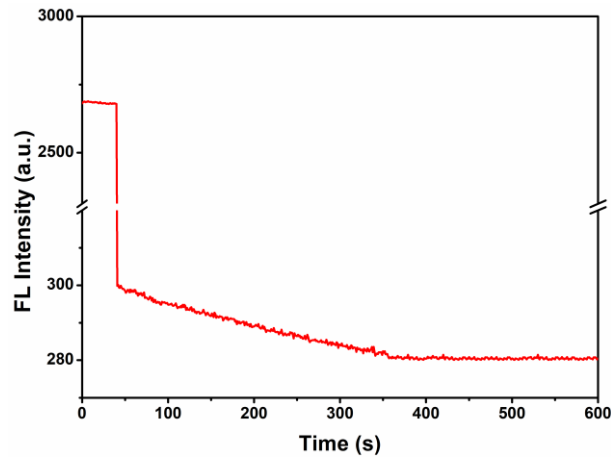

**Figure. S3** The optimum time for quenching was investigated by adding GO (final concentration:1.0 mg/ml) into Pep-Pdots solution after 40s and record the fluorescence at 536 nm during the time 0-600s.

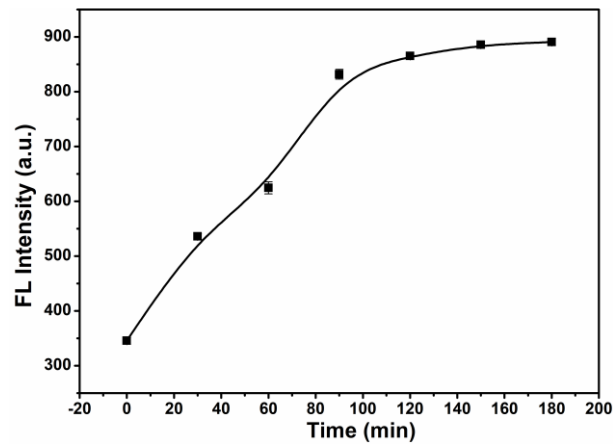

**Figure. S4** Fluorescence recovery in GO-Pep-Pdots nanocomplex as a function of reaction time in the presence of MMP-9 (final concentration:80 ng/ml).

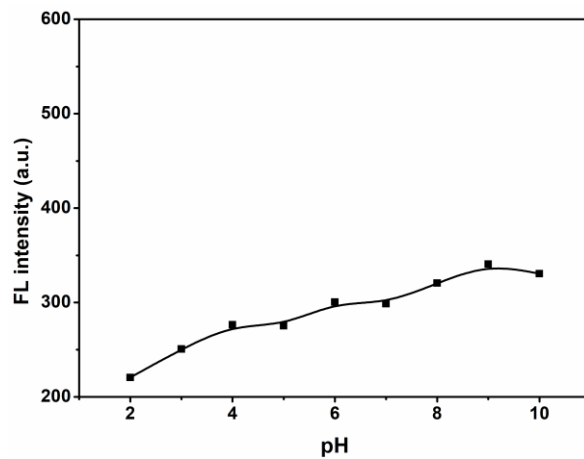

**Figure. S5** Fluorescence intensity of the GO-Pep-Pdots nanocomplex at varying pH.

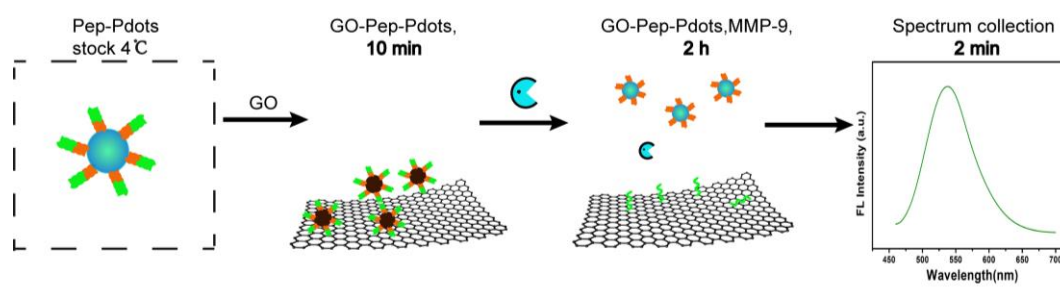

**Figure. S6** Schematic representation of steps and the time taken for each.

**Table. S1** The pathological information of the prostate patients and healthy people.

| Patient No. | Age (Years) | Cancer staging <sup>a</sup> | Gleason score <sup>b</sup> |
|-------------|-------------|-----------------------------|----------------------------|
| 1           | 64          | -                           | -                          |
| 2           | 72          | -                           | -                          |
| 3           | 68          | -                           | -                          |
| 4           | 71          | 2                           | 4+3                        |
| 5           | 75          | 2                           | 3+3                        |
| 6           | 74          | 3                           | 4+3                        |
| 7           | 72          | 2                           | 3+4                        |
| 8           | 78          | 4                           | 4+5                        |
| 9           | 76          | 1                           | 3+3                        |
| 10          | 75          | 2                           | 3+4                        |
| 11          | 77          | 2                           | 4+4                        |
| 12          | 59          | 2                           | 3+3                        |
| 13          | 79          | 2                           | 3+4                        |

<sup>a,b</sup> Important indicators of classification of urinary and male reproductive system tumors in WHO.
